# Supplementary material for: Real-Time Monitoring of Laser-Induced Functionalisation of Transparent Conductive Oxide Films
Source: Preprints.org preprint supplement (doi:10.20944/preprints202309.0939.v1), 2023-09-14
Supplement: Supplementary file 1 [file SuppMater.docx]

**Real-time Monitoring of Laser-induced Functionalisation of Transparent Conductive Oxide Films**

Takuya Hosokai 1,*, Junichi Nomoto 2

1 Research Institute for Material and Chemical Measurement, National Metrology Institute of Japan (NMIJ), National Institute of Advanced Industrial Science and Technology (AIST), Central 5, 1-1-1 Hi-gashi, Tsukuba, Ibaraki 305-8565, Japan

2 Advanced Manufacturing Research Institute, National Institute of Advanced Industrial Science and Technology (AIST), Central 5, 1-1-1 Higashi, Tsukuba, Ibaraki 305-8565, Japan

* Correspondence: t.hosokai@aist.go.jp

**Supplementary Material Section**


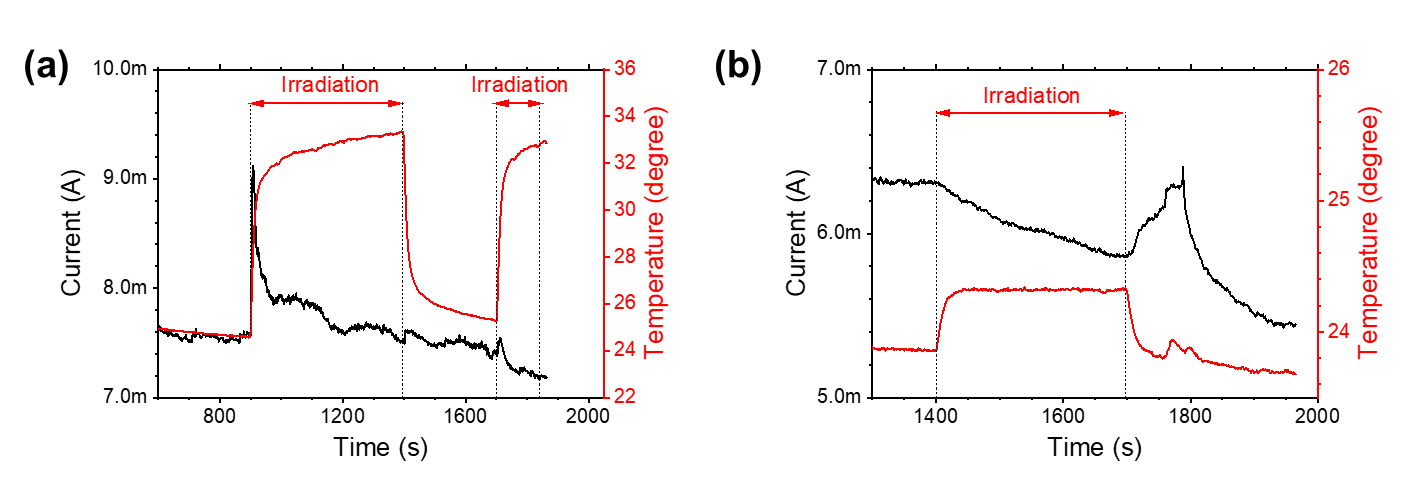


**Figure S1.** Temporal results of the temperature and current of the ICO:H/PET films under FHG irradiation. (a) laser repetition rate was 1 kH (a) and 100 Hz (b).
